# Supplementary material for: INF2 mutations cause kidney disease through a gain-of-function mechanism
Source: PubMed Central journal article supplement — Sci Adv. 2024 Nov 13;10(46):eadr1017. doi: 10.1126/sciadv.adr1017 (PMC11559609; doi:10.1126/sciadv.adr1017), 2024-11-13
Supplement: sciadv.adr1017_sm.pdf [file sciadv.adr1017_sm.pdf]

Supplementary Materials for  
**INF2 mutations cause kidney disease through a gain-of-function mechanism**

Balajikarthick Subramanian *et al.*

Corresponding author: Balajikarthick Subramanian, [bsubram1@bidmc.harvard.edu](mailto:bsubram1@bidmc.harvard.edu);  
Martin R. Pollak, [mpollak@bidmc.harvard.edu](mailto:mpollak@bidmc.harvard.edu)

*Sci. Adv.* **10**, eadr1017 (2024)  
DOI: 10.1126/sciadv.adr1017

**This PDF file includes:**

Figs. S1 to S5  
Table S1

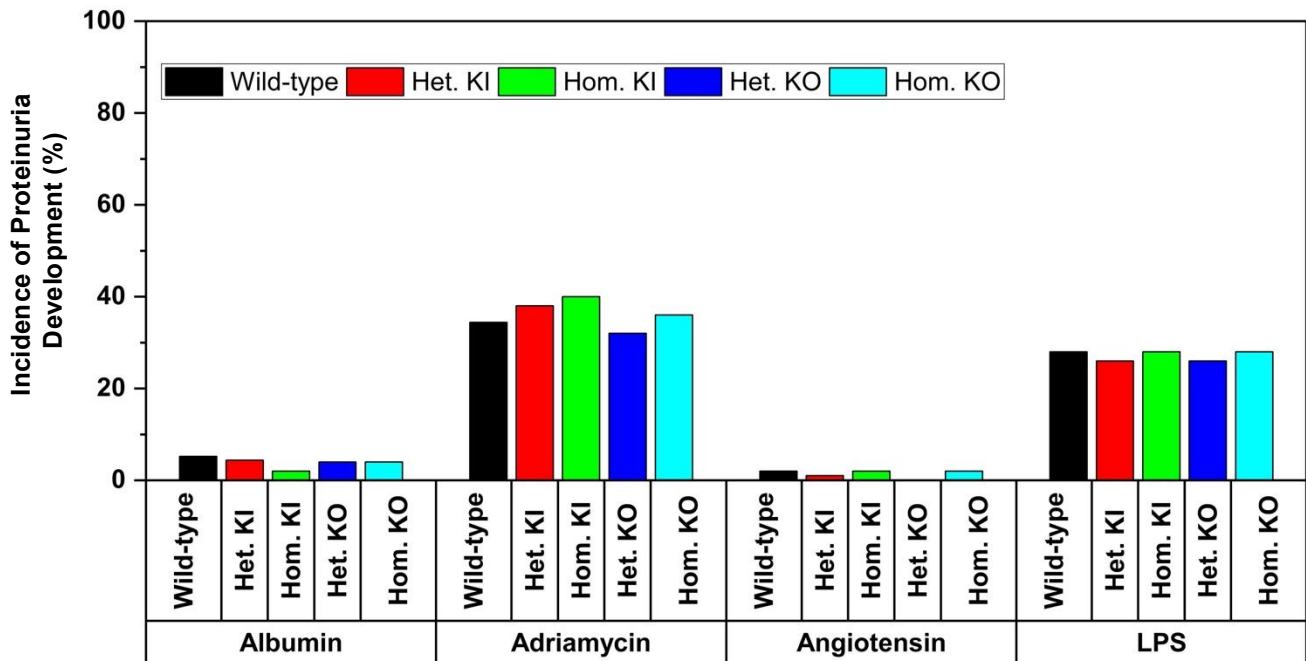

**Figure S1. Incidence of proteinuria development among INF2 mouse models subjected to various podocyte stressors.** INF2 mouse models were exposed to albumin, adriamycin, angiotensin, and LPS and then evaluated for proteinuria development. The percent count of mice exhibiting proteinuria at Day 5 post-injury was recorded. None of the stressors were able to induce disease in INF2 mouse models selectively.

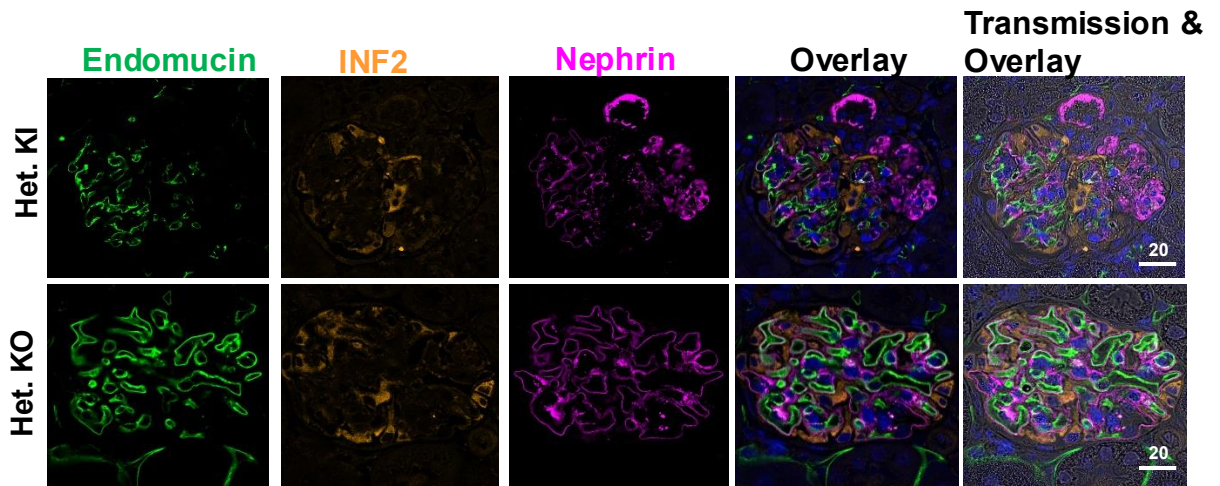

**Figure S2. Glomerular marker protein analysis.** PAN-stressed heterozygous knock-in and heterozygous knock-out mice kidney sections were stained for glomerular marker proteins: Nephrin (Purple); Endomucin (Green); INF2 (Orange). Focal sclerotic lesions were present in PAN-stressed heterozygous knock-in mice (white arrow). Scale bar, 10  $\mu$ m

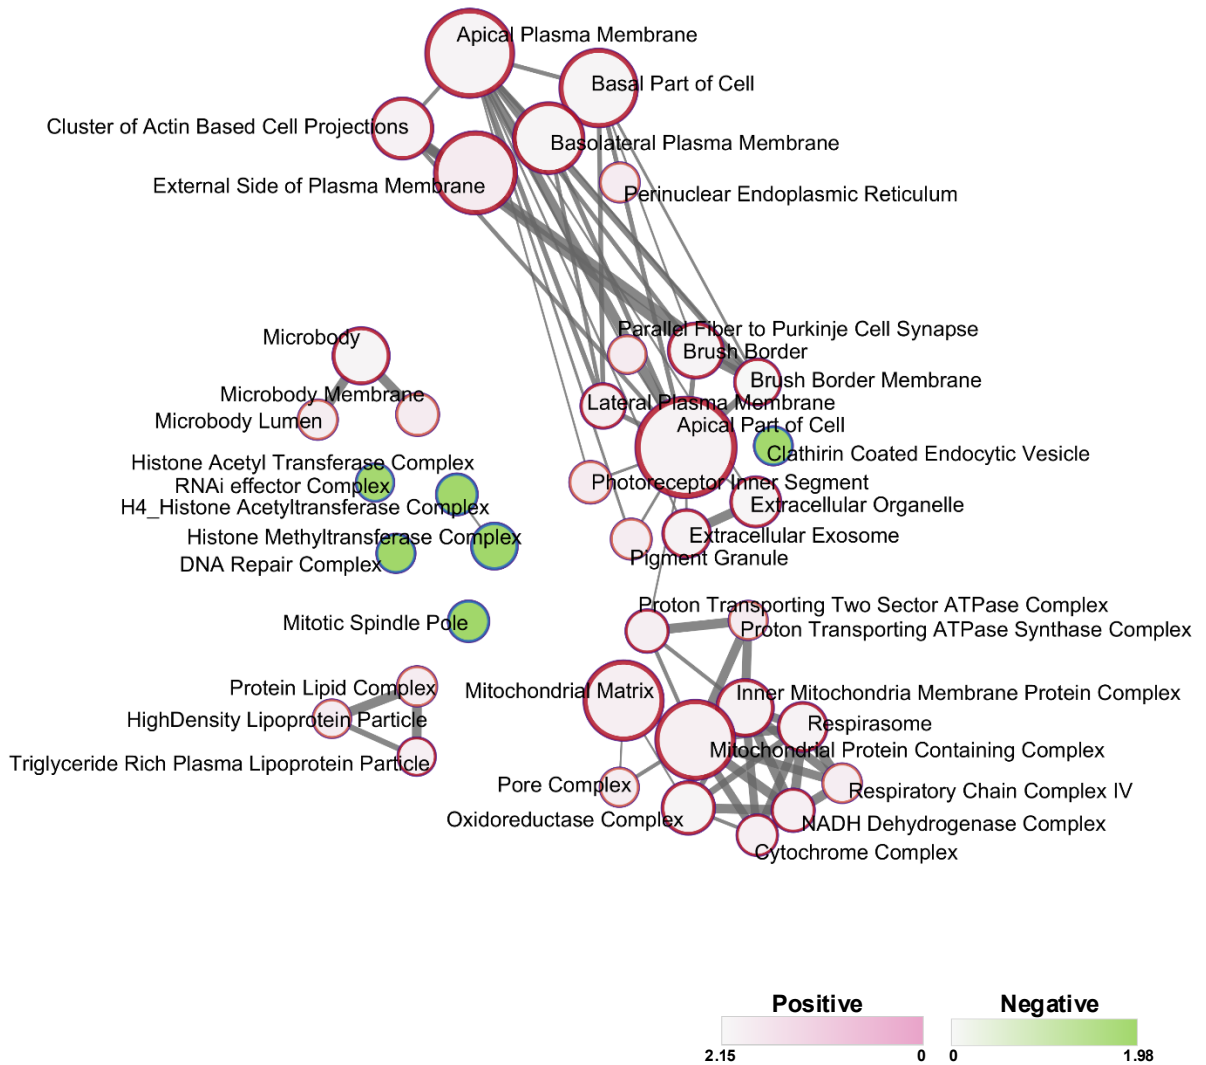

**Figure S3.** Gene Set Enrichment Network. Pathways that were significantly enriched in the comparison between the PAN-stressed heterozygous knock-in and heterozygous knock-out condition were plotted as a network in the Cytoscape application. Color nodes indicate the upregulated and down-regulated pathways. Connecting lines indicate the gene overlap between pathways. Nodes were manually laid out to form a clearer picture of gene overlaps between pathways. Individual node labels indicate the enriched pathway.

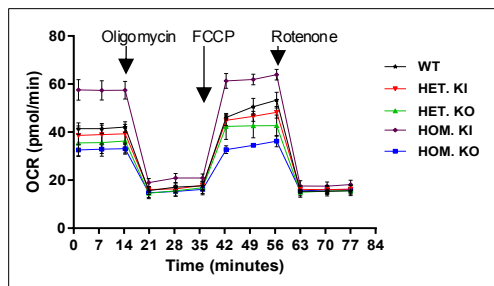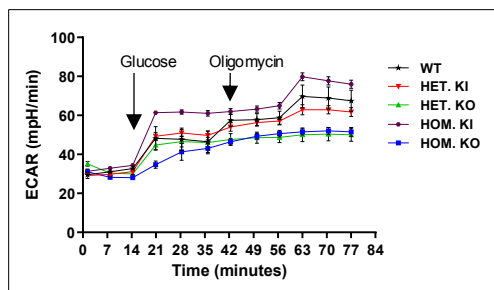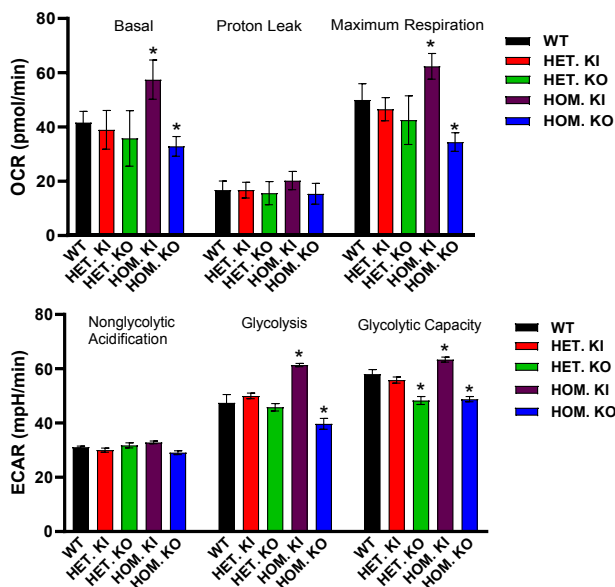

**Figure S4.** Mitochondrial bioenergetics in podocytes. Seahorse analyses were conducted in basal conditions of podocytes derived from INF2 knock-in and knockout models. (a) oxygen consumption rate (OCR) and (b) basal respiration, proton leak, and maximum respiration in podocytes. (c) extracellular acidification rate (ECAR) and (d) non-glycolytic acidification, glycolysis, and glycolytic capacity in podocytes. Statistical analyses were conducted by comparison with the wild-type group. \*  $p < 0.05$ .

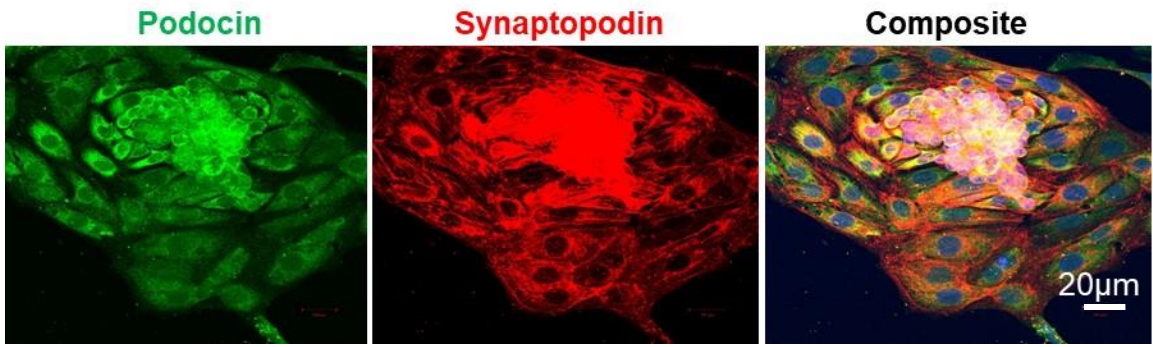

**Figure S5.** Immunofluorescence analysis of podocytes derived from organoids. The outgrown cells were stained for podocyte marker proteins podocin and synaptopodin, and the nucleus was counterstained using DAPI.

**y Table 1** Gene sets enriched in Het-KI phenotype

| Gene Sets                                                                     | Size | NES  | FDR q-value |
|-------------------------------------------------------------------------------|------|------|-------------|
| GOCC_BRUSH_BORDER_MEMBRANE                                                    | 72   | 2.16 | 0           |
| GOCC_EXTRACELLULAR_ORGANELLE                                                  | 96   | 2.05 | 0           |
| GOCC_BASOLATERAL_PLASMA_MEMBRANE                                              | 229  | 2    | 0.001       |
| GOCC_BASAL_PART_OF_CELL                                                       | 274  | 1.98 | 0.001       |
| GOCC_MICROBODY                                                                | 136  | 1.98 | 0.001       |
| GOCC_APICAL_PLASMA_MEMBRANE                                                   | 341  | 1.97 | 0.001       |
| GOCC_OXIDOREDUCTASE_COMPLEX                                                   | 112  | 1.97 | 0.001       |
| GOCC_BRUSH_BORDER                                                             | 128  | 1.92 | 0.001       |
| GOCC_EXTRACELLULAR_EXOSOME                                                    | 80   | 1.92 | 0.001       |
| GOCC_RESPIRASOME                                                              | 88   | 1.92 | 0.001       |
| GOCC_APICAL_PART_OF_CELL                                                      | 421  | 1.89 | 0.002       |
| GOCC_INNER_MITOCHONDRIAL_MEMBRANE_PROTEIN_COMPLEX                             | 139  | 1.84 | 0.004       |
| GOCC_CLUSTER_OF_ACTIN_BASED_CELL_PROJECTIONS                                  | 166  | 1.84 | 0.004       |
| GOCC_NADH_DEHYDROGENASE_COMPLEX                                               | 47   | 1.81 | 0.006       |
| GOCC_LATERAL_PLASMA_MEMBRANE                                                  | 60   | 1.78 | 0.009       |
| GOCC_CYTOCHROME_COMPLEX                                                       | 35   | 1.78 | 0.009       |
| GOCC_TRIGLYCERIDE_RICH_PLASMA_LIPOPROTEIN_PARTICLE                            | 15   | 1.76 | 0.011       |
| GOCC_MITOCHONDRIAL_PROTEIN_CONTAINING_COMPLEX                                 | 283  | 1.74 | 0.013       |
| GOCC_MITOCHONDRIAL_MATRIX                                                     | 285  | 1.73 | 0.015       |
| GOCC_PROTON_TRANSPORTING_TWO_SECTOR_ATPASE_COMPLEX                            | 47   | 1.67 | 0.028       |
| GOCC_RESPIRATORY_CHAIN_COMPLEX_IV                                             | 23   | 1.66 | 0.034       |
| GOCC_PORE_COMPLEX                                                             | 20   | 1.65 | 0.035       |
| GOCC_MICROBODY_LUMEN                                                          | 27   | 1.65 | 0.033       |
| GOCC_HIGH_DENSITY_LIPOPROTEIN_PARTICLE                                        | 16   | 1.62 | 0.045       |
| GOCC_PROTEIN_LIPID_COMPLEX                                                    | 27   | 1.61 | 0.049       |
| GOCC_PIGMENT_GRANULE                                                          | 32   | 1.61 | 0.051       |
| GOCC_MICROBODY_MEMBRANE                                                       | 45   | 1.56 | 0.08        |
| GOCC_PERINUCLEAR_ENDOPLASMIC_RETICULUM                                        | 26   | 1.56 | 0.081       |
| GOCC_PROTON_TRANSPORTING_ATP_SYNTHASE_COMPLEX                                 | 20   | 1.55 | 0.081       |
| GOCC_EXTERNAL_SIDE_OF_PLASMA_MEMBRANE                                         | 303  | 1.55 | 0.08        |
| GOCC_PARALLEL_FIBER_TO_PURKINJE_CELL_SYNAPSE                                  | 17   | 1.54 | 0.086       |
| GOCC_PHOTORECEPTOR_INNER_SEGMENT                                              | 42   | 1.53 | 0.091       |
| GOCC_RIBOSOMAL_SUBUNIT                                                        | 193  | 1.49 | 0.134       |
| GOCC_MICROVILLUS                                                              | 85   | 1.49 | 0.131       |
| GOCC_CELL_PROJECTION_MEMBRANE                                                 | 260  | 1.49 | 0.129       |
| GOCC_TRICARBOXYLIC_ACID_CYCLE_ENZYME_COMPLEX                                  | 20   | 1.47 | 0.149       |
| GOCC_APICOLATERAL_PLASMA_MEMBRANE                                             | 22   | 1.47 | 0.146       |
| GOCC_ENDOPLASMIC_RETICULUM_GOLGI_INTERMEDIATE_COMPARTMENT_MEMBRANE            | 16   | 1.46 | 0.161       |
| GOCC_CYTOSOLIC_LARGE_RIBOSOMAL_SUBUNIT                                        | 62   | 1.44 | 0.173       |
| GOCC_APICAL_JUNCTION_COMPLEX                                                  | 129  | 1.44 | 0.174       |
| GOCC_PROTON_TRANSPORTING_TWO_SECTOR_ATPASE_COMPLEX_CATALYTIC_DOMAIN           | 16   | 1.44 | 0.171       |
| GOCC_VACUOLAR_PROTON_TRANSPORTING_V_TYPE_ATPASE_COMPLEX                       | 23   | 1.43 | 0.173       |
| GOCC_CATENIN_COMPLEX                                                          | 16   | 1.43 | 0.17        |
| GOCC_MONOATOMIC_ION_CHANNEL_COMPLEX                                           | 153  | 1.43 | 0.169       |
| GOCC_LARGE_RIBOSOMAL_SUBUNIT                                                  | 119  | 1.43 | 0.167       |
| GOCC_CYTOSOLIC_RIBOSOME                                                       | 123  | 1.42 | 0.183       |
| GOCC_PROTON_TRANSPORTING_V_TYPE_ATPASE_COMPLEX                                | 27   | 1.41 | 0.186       |
| GOCC_TRANSPORTER_COMPLEX                                                      | 258  | 1.41 | 0.183       |
| GOCC_HIPPOCAMPAL_MOSSY_FIBER_TO_CA3_SYNAPSE                                   | 42   | 1.41 | 0.182       |
| GOCC_SMALL_RIBOSOMAL_SUBUNIT                                                  | 79   | 1.4  | 0.193       |
| GOCC_CYTOSOLIC_SMALL_RIBOSOMAL_SUBUNIT                                        | 44   | 1.39 | 0.205       |
| GOCC_TIGHT_JUNCTION                                                           | 114  | 1.39 | 0.208       |
| GOCC_PHOTORECEPTOR_OUTER_SEGMENT                                              | 52   | 1.38 | 0.214       |
| GOCC_CATION_CHANNEL_COMPLEX                                                   | 100  | 1.36 | 0.252       |
| GOCC_PROTON_TRANSPORTING_TWO_SECTOR_ATPASE_COMPLEX_PROTON_TRANSPORTING_DOMAIN | 21   | 1.36 | 0.25        |
